# Supplementary material
Source: Elsevier journal article supplement (https://www.sciencedirect.com/science/article/pii/S2173507719302431)
Supplement: mmc1 [file S2173507719302431:mmc1.docx]

**Apéndice 1.** Cuestionario sobre dieta

| **Cereales y tubérculos** | Pasta  Pan  Arroz  Cereales  Tostadas  Boniato  Patatas | Pasta al huevo  Patatas fritas  Galletas | Pastelería industrial  Patatas chip  Sopa de sobre |
| --- | --- | --- | --- |
| **Fruta y Verduras** | Fruta  Verdura  Hortalizas  Legumbres | Aguacate  Aceitunas | Coco |
| **Leche y derivados** | Leche  Yogur  Queso  Desnatados | Leche semidesnatada  Yogur semidesnatado | Leche entera  Yogur griego/Yogur entero  Queso crema  Queso curado  Flan de huevo |
| **Pescados y Mariscos** | Pescado blanco y azul  Moluscos | Calamar  Sepia  Marisco  Pescado en conserva | Huevas de pescado  Pescado frito en aceite |
| **Carne y Huevos** | Pollo sin piel  Pavo sin piel  Conejo  Clara de Huevo | Jamón cocido  Huevo  Cerdo  Ternera  Carne de caballo  Codorniz | Bacon  Vísceras  Croquetas  Salchichas  Hamburguesas  Empanadillas  Cordero  Pato  Paté  Buñuelos |
| **Grasas** | Aceite de Oliva  Sofritos  Salsas | Aceite de Girasol  Mayonesa casera  Margarina vegetal | Aceite de palma  Aceite de coco  Mantequilla  Manteca  Mayonesa comercial |
| **Azúcares y dulces** | Azúcar  Mermelada  Membrillo  Postres caseros con leche desnatada | Caramelos  Turrón | Helados  Pasteles  Chocolate  Postres con leche entera y/o huevos |
| **Frutos secos** | Nueces  Almendras  Avellanas  Piñones | Cacahuetes | Cacahuetes salados  Frutos secos fritos |

**Apéndice 2.** Evaluación final a los 6 meses

1. Tras la operación, y en relación con sus deposiciones:
2. No he notado diferencia
3. Voy más estreñido/a
4. Tuve diarrea al principio y luego ya no
5. Sigo con diarreas
6. Las heces son más blandas o voy más a menudo
7. Tras la operación, y en relación con la comida:
8. Al principio comí con menos grasas en la dieta
9. Sigo comiendo con menos grasas en la dieta
10. En seguida empecé a comer con grasas en la dieta
11. Diría que las grasas me sientan:
    1. Bien
    2. Regular
    3. Mal
12. Comí menos grasas (aquí puede marcarlas todas si es necesario)
    1. Porque me lo recomendó el personal sanitario
    2. Porque me informé en internet o en revistas
    3. Porque me lo recomendaron mis amistades
